# Supplementary material
Source: PubMed Central journal article supplement (PMC7867587)
Supplement: NIHMS1649966-supplement-1.pdf [file NIHMS1649966-supplement-1.pdf]

**Supplementary Table 1. Relative Risk Ratios (RRRs) and 95% Confidence Intervals (CIs) of Neighborhood Socioeconomic Status (nSES) and Breast Cancer Subtypes Among Black Women Stratified by Census Tract-Level Proportion of Black Residents<sup>1,2</sup>**

|                                                                                                          |              | Tertile of nSES score |                   |                    |                 |
|----------------------------------------------------------------------------------------------------------|--------------|-----------------------|-------------------|--------------------|-----------------|
|                                                                                                          |              | T1<br>Lowest nSES     | T2<br>Middle nSES | T3<br>Highest nSES | <i>p</i> -trend |
| <b>Among Black women residing in census tracts with lower proportion of Black residents<sup>3</sup></b>  |              |                       |                   |                    |                 |
| Luminal A                                                                                                | <i>n</i> (%) | 73 (20.5)             | 87 (24.4)         | 196 (55.1)         |                 |
| HER2-positive                                                                                            | <i>n</i> (%) | 28 (21.7)             | 43 (33.3)         | 58 (45.0)          |                 |
|                                                                                                          | RRR [95% CI] | 1.44 [0.82-2.55]      | 1.74 [1.06-2.88]  | 1 [reference]      | .06             |
| Triple-negative                                                                                          | <i>n</i> (%) | 52 (33.6)             | 47 (30.3)         | 56 (36.1)          |                 |
|                                                                                                          | RRR [95% CI] | 2.42 [1.45-4.05]      | 1.86 [1.14-3.04]  | 1 [reference]      | <.001           |
| <b>Among Black women residing in census tracts with higher proportion of Black residents<sup>3</sup></b> |              |                       |                   |                    |                 |
| Luminal A                                                                                                | <i>n</i> (%) | 164 (46.3)            | 150 (42.4)        | 40 (11.3)          |                 |
| HER2-positive                                                                                            | <i>n</i> (%) | 51 (50.0)             | 35 (34.3)         | 16 (15.7)          |                 |
|                                                                                                          | RRR [95% CI] | 0.89 [0.43-1.83]      | 0.62 [0.30-1.28]  | 1 [reference]      | .92             |
| Triple-negative                                                                                          | <i>n</i> (%) | 58 (46.8)             | 55 (44.2)         | 11 (8.9)           |                 |
|                                                                                                          | RRR [95% CI] | 1.14 [0.52-2.48]      | 1.30 [0.60-2.80]  | 1 [reference]      | .92             |

<sup>1</sup> *p*-for-interaction = .051.

<sup>2</sup> Multilevel multinomial logistic regression models were used. Model adjusted for age at diagnosis (y, group-mean centered), education (≤high school, some college, ≥college), household poverty level (<100% federal poverty line, ≥100% federal poverty line, unknown), health insurance (private, Medicaid, Medicare, uninsured, other/unknown), menopausal status (yes, no), parity/age at first birth/lactation (nulliparous, <25y never breastfed, <25y ever breastfed, ≥25y never breastfed, ≥25y ever breastfed), and BMI 1 year prior to diagnosis (kg/m<sup>2</sup>, group-mean centered).

<sup>3</sup> Median value (52.12%) was used to define low vs. high proportion of Black residents.
