# Supplementary material
Source: PubMed Central journal article supplement (PMC7867587)
Supplement: NIHMS1649966-supplement-2.pdf [file NIHMS1649966-supplement-2.pdf]

**Supplementary Table 2. Relative Risk Ratios (RRRs) and 95% Confidence Intervals (CIs) of Neighborhood Socioeconomic Status (nSES) and Breast Cancer Subtypes Among Black Women Stratified by Education Level<sup>1,2</sup>**

|                                                                            |              | Tertile of nSES score |                   |                    |                 |
|----------------------------------------------------------------------------|--------------|-----------------------|-------------------|--------------------|-----------------|
|                                                                            |              | T1<br>Lowest nSES     | T2<br>Middle nSES | T3<br>Highest nSES | <i>p</i> -trend |
| <b>Among Black women with college education or higher</b>                  |              |                       |                   |                    |                 |
| Luminal A                                                                  | <i>n</i> (%) | 44 (19.2)             | 70 (30.6)         | 115 (50.2)         |                 |
| HER2-positive                                                              | <i>n</i> (%) | 9 (13.0)              | 22 (31.9)         | 38 (55.1)          |                 |
|                                                                            | RRR [95% CI] | 0.74 [0.30-1.80]      | 1.04 [0.53-2.09]  | 1 [reference]      | .66             |
| Triple-negative                                                            | <i>n</i> (%) | 13 (21.7)             | 20 (33.3)         | 27 (45.0)          |                 |
|                                                                            | RRR [95% CI] | 1.25 [0.52-3.03]      | 1.53 [0.72-3.24]  | 1 [reference]      | .42             |
| <b>Among Black women with high school education, some college or lower</b> |              |                       |                   |                    |                 |
| Luminal A                                                                  | <i>n</i> (%) | 193 (40.1)            | 167 (34.7)        | 121 (25.2)         |                 |
| HER2-positive                                                              | <i>n</i> (%) | 70 (43.2)             | 56 (34.6)         | 36 (22.2)          |                 |
|                                                                            | RRR [95% CI] | 2.17 [1.24-3.79]      | 1.78 [1.03-3.08]  | 1 [reference]      | .007            |
| Triple-negative                                                            | <i>n</i> (%) | 97 (44.3)             | 82 (37.4)         | 40 (18.3)          |                 |
|                                                                            | RRR [95% CI] | 2.33 [1.39-3.90]      | 2.04 [1.24-3.38]  | 1 [reference]      | .001            |

<sup>1</sup> *p*-for-interaction = .42.

<sup>2</sup> Multilevel multinomial logistic regression models were used. Model adjusted for age at diagnosis (y, group-mean centered), household poverty level (<100% federal poverty line, ≥100% federal poverty line, unknown), health insurance (private, Medicaid, Medicare, uninsured, other/unknown), menopausal status (yes, no), parity/age at first birth/lactation (nulliparous, <25y never breastfed, <25y ever breastfed, ≥25y never breastfed, ≥25y ever breastfed), BMI 1 year prior to diagnosis (kg/m<sup>2</sup>, group-mean centered) and census tract-level proportion of Black residents (quintile)
