# Supplementary material
Source: PubMed Central journal article supplement (PMC7867587)
Supplement: NIHMS1649966-supplement-3.pdf [file NIHMS1649966-supplement-3.pdf]

**Supplementary Table 3. Relative Risk Ratios (RRRs) and 95% Confidence Intervals (CIs) of Neighborhood Socioeconomic Status (nSES) and Breast Cancer Subtypes Among Black Women Stratified by Menopausal Status<sup>1,2</sup>**

|                                    |              | Tertile of nSES score |                   |                    |                 |
|------------------------------------|--------------|-----------------------|-------------------|--------------------|-----------------|
|                                    |              | T1<br>Lowest nSES     | T2<br>Middle nSES | T3<br>Highest nSES | <i>p</i> -trend |
| <b>Among pre-menopausal women</b>  |              |                       |                   |                    |                 |
| Luminal A                          | <i>n</i> (%) | 84 (33.1)             | 73 (28.7)         | 97 (38.2)          |                 |
| HER2-positive                      | <i>n</i> (%) | 36 (35.0)             | 36 (35.0)         | 31 (30.1)          |                 |
|                                    | RRR [95% CI] | 1.72 [0.85-3.47]      | 1.78 [0.94-3.40]  | 1 [reference]      | .10             |
| Triple-negative                    | <i>n</i> (%) | 48 (38.4)             | 41 (32.8)         | 36 (28.8)          |                 |
|                                    | RRR [95% CI] | 1.63 [0.85-3.13]      | 1.55 [0.85-2.85]  | 1 [reference]      | .12             |
| <b>Among post-menopausal women</b> |              |                       |                   |                    |                 |
| Luminal A                          | <i>n</i> (%) | 153 (33.6)            | 164 (36.0)        | 139 (30.5)         |                 |
| HER2-positive                      | <i>n</i> (%) | 43 (33.6)             | 42 (32.8)         | 43 (33.6)          |                 |
|                                    | RRR [95% CI] | 1.27 [0.71-2.29]      | 1.05 [0.60-1.85]  | 1 [reference]      | .45             |
| Triple-negative                    | <i>n</i> (%) | 62 (40.3)             | 61 (39.6)         | 31 (20.1)          |                 |
|                                    | RRR [95% CI] | 2.37 [1.31-4.29]      | 2.17 [1.22-3.83]  | 1 [reference]      | .005            |

<sup>1</sup> *p*-for-interaction = .39.

<sup>2</sup> Multilevel multinomial logistic regression models were used. Model adjusted for age at diagnosis (y, group-mean centered), education (≤high school, some college, ≥college), household poverty level (<100% federal poverty line, ≥100% federal poverty line, unknown), health insurance (private, Medicaid, Medicare, uninsured, other/unknown), parity/age at first birth/lactation (nulliparous, <25y never breastfed, <25y ever breastfed, ≥25y never breastfed, ≥25y ever breastfed), BMI 1 year prior to diagnosis (kg/m<sup>2</sup>, group-mean centered) and census tract-level proportion of Black residents (quintile)
