# Supplementary material
Source: PubMed Central journal article supplement (PMC7867587)

**Supplementary Fig. 1. Relative Risk Ratios (RRRs) and 95% Confidence Intervals (CIs) for Triple-Negative Breast Cancer by Neighborhood Socioeconomic Status (nSES) and Personal Education Level.** nSES scores were categorized into tertiles. Model adjusted for age at diagnosis, household poverty level, health insurance, menopausal status, parity/age at first birth/lactation, BMI 1 year prior to diagnosis, and census tract-level proportion of Black residents.

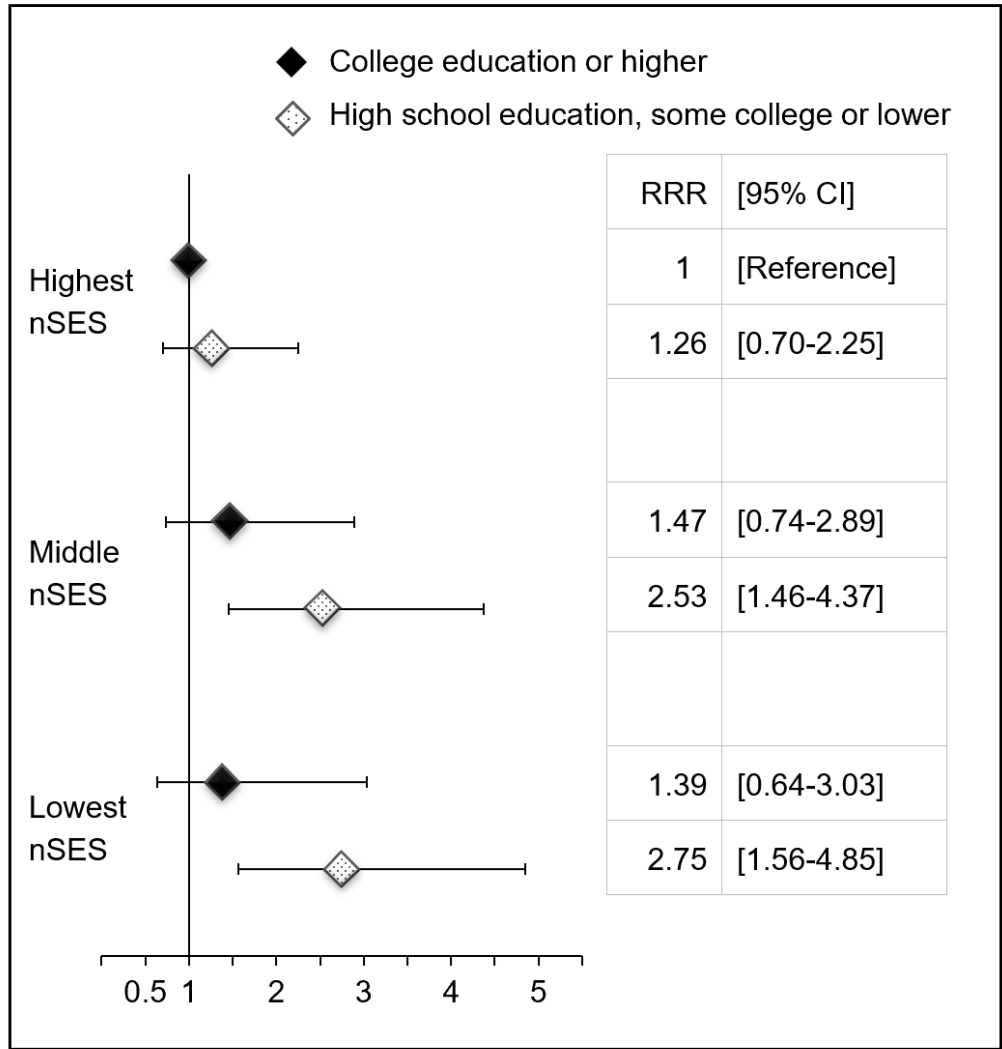

Supplement: NIHMS1649966-supplement-4.pdf [file NIHMS1649966-supplement-4.pdf]
